# Supplementary material for: Proteomics-Metabolomics Combined Approach Identifies Peroxidasin as a Protector against Metabolic and Oxidative Stress in Prostate Cancer
Source: PubMed Central journal article supplement (PMC6627806; doi:10.3390/ijms20123046), 2019-06-21
Supplement: ijms-20-03046-s001.pdf [file ijms-20-03046-s001.pdf]

## Supplemental Table S1

**Table S1. Patient characteristics of prostate cancer microarray utilized in this study.** 96 core prostate adenocarcinoma tissue microarray was utilized and representative patient data shown. Clinical data includes age, pathology diagnosis, stage Gleason score Type, Prostate Sera Antigen (PSA) status. T=Primary Tumor N= Regional Lymph Nodes M= Distant Metastasis.

| Position | Age | Organ    | Pathology diagnosis | Stage | Gleason score | TNM     | Type      | PSA ng/mL |
|----------|-----|----------|---------------------|-------|---------------|---------|-----------|-----------|
| G9       | 69  | Prostate | Normal              | *     | *             | *       |           | *         |
| B6       | 62  | Prostate | Adenocarcinoma      | II    | 7             | T2cN0M1 | Malignant | 37.3      |
| B10      | 60  | Prostate | Adenocarcinoma      | III   | 9             | T3bN0M0 | Malignant | 40        |
| B12      | 70  | Prostate | Adenocarcinoma      | IV    | 7             | T4N0M0  | Malignant | 7         |
